# Supplementary material for: FPSC-DTI: drug–target interaction prediction based on feature projection fuzzy classification and super cluster fusion
Source: Royal Society of Chemistry journal article supplement (doi:10.1039/d0mo00062k), 2020-10-08
Supplement: d0mo00062k1.pdf [file d0mo00062k1.pdf]

## Appendix A FPSC-DTI supplement

### A.1 Mean percentile ranking *MPR*

The mean percentile ranking (*MPR*) [1–3], a recall-based statistical metric, is adopted to evaluate the method’s performance. This is a good evaluation criterion for one-class datasets [4, 5]. Specifically, for each drug  $d_i$  in the test set, we generate a ranked list of the targets sorted in descending order by the predicted scores between the current drug with all targets in the dataset. Let  $rank_{ji}$  denote the percentile ranking (PR) of target  $t_j$  with drug  $d_i$ . The smaller the *rank* value is, the better the prediction performance of the algorithm. For example,  $rank_{ji} = 0\%$  indicates that drug  $d_i$  is predicted to interact with target  $t_j$  with the highest probability. Similarly,  $rank_{ji} = 100\%$  signifies that drug  $d_i$  is predicted to interact with target  $t_j$  with the lowest probability. Herein, the definition of *MPR* is as follows:

$$MPR = \frac{\sum_{i=1}^{N_D^t} R_i}{N_D^t} \quad (1)$$

where  $N_D^t$  denotes the number of drugs in the test set, and  $R_i$  can be computed as follows:

$$R_i = \frac{\sum_{j=1}^{N_T^t} rank_{ji}}{N_T^t} \quad (2)$$

where  $N_T^t$  denotes the number of targets in the test set for the current drug  $d_i$ .

### A.2 Cluster analysis of the four benchmark datasets

Since there is no class label information in the drug and target data of the four benchmark datasets, we firstly determine them the number of clusters. In this paper, we use the decision graph of DPCSA [6] to determine the number of clusters, which requires none predefined parameter. Then, we use INCK [7], an improved K-medoids algorithm, to cluster drug and target data, respectively. All the clustering results are given in Table A1.

**Table A1:** Clustering results of four benchmark datasets

| Dataset | Number of objects in each cluster |                            |
|---------|-----------------------------------|----------------------------|
|         | Drug                              | Target                     |
| Enzyme  | 59,19,17,101,15,7,46,4,13,3       | 123,40,19,2,2,43,20,25,6,9 |
|         | 10,10,19,19,33,12,12,20,11,15     | 9,15,21,3,10,6,289,6,10,6  |
| GPCR    | 48,27,11,19,16,6,14,11,6,22       | 30,23,10,4,5,16,7          |
|         | 9,10,10,14                        |                            |
| IC      | 72,10,12,14,12,10                 | 39,17,6,41,9,4,7,20        |
|         | 15,22,11,14,18                    | 6,5,14,5,11,8,12           |
| NR      | 18,15,7,9,5                       | 12,5,5,4                   |

## References

- [1] Christopher C Johnson. Logistic matrix factorization for implicit feedback data. *Advances in Neural Information Processing Systems*, 27:1–9, 2014.
- [2] Yifan Hu, Yehuda Koren, and Chris Volinsky. Collaborative filtering for implicit feedback datasets. In *Data Mining, 2008. ICDM'08. Eighth IEEE International Conference on*, pages 263–272. Ieee, 2008.
- [3] Ming Hao, Stephen H Bryant, and Yanli Wang. Open-source chemogenomic data-driven algorithms for predicting drug–target interactions. *Briefings in Bioinformatics*, 2018.
- [4] Ming Hao, Stephen H Bryant, and Yanli Wang. A new chemoinformatics approach with improved strategies for effective predictions of potential drugs. *Journal of Cheminformatics*, 10:50, 2018.
- [5] Xu Zhou, Enyu Dai, Qian Song, Xueyan Ma, Qianqian Meng, Yongshuai Jiang, and Wei Jiang. In silico drug repositioning based on drug-mirna associations. *Briefings in Bioinformatics*, 2019.
- [6] Donghua Yu, Guojun Liu, Maozu Guo, Xiaoyan Liu, and Shuang Yao. Density peaks clustering based on weighted local density sequence and nearest neighbor assignment. *IEEE Access*, 7:34301–34317, 2019.
- [7] Donghua Yu, Guojun Liu, Maozu Guo, and Xiaoyan Liu. An improved k-medoids algorithm based on step increasing and optimizing medoids. *Expert Systems with Applications*, 92:464–473, 2018.
